# Supplementary material for: Impact of cascade screening for catecholaminergic polymorphic ventricular tachycardia type 1
Source: PubMed Central journal article supplement — Heart. 2022 Feb 8;108(11):840–7. doi: 10.1136/heartjnl-2021-320220 (PMC9120385; doi:10.1136/heartjnl-2021-320220), 2022-02-08
Supplement: heartjnl-2021-320220supp001.pdf [file heartjnl-2021-320220supp001.pdf]

# Supplemental Materials

## Impact of cascade screening for catecholaminergic polymorphic ventricular tachycardia type 1

Shimamoto, et al

**Supplemental Table 1**

**Supplemental Table 2**

**Supplemental Table 3**

**Supplemental Table 4**

**Supplemental Table 5**

**Supplemental Table 6**

**Supplemental Table 7**

**Supplemental Table 8**

**Supplemental Table 9**

**Supplemental Table 10**

Supplemental References

**Supplemental Table 1. RYR2 variant classification according to the American College of Medical Genetics (ACMG) guideline.**

| Variants        |                | PVS1 | PS1 | PS2 | PS3 | PS4 | PM1 | PM2 | PM3 | PM4 | PM5 | PM6 | PP1 | PP2 | PP3 | PP4 | PP5 | ACMG |
|-----------------|----------------|------|-----|-----|-----|-----|-----|-----|-----|-----|-----|-----|-----|-----|-----|-----|-----|------|
| c.100A>G        | p.K34E         |      |     | 1   |     |     |     | 1   |     |     |     |     |     |     | 1   | 1   |     | LP   |
| exon 3 deletion | p.N57_G91del35 |      |     |     | 1   |     | 1   | 1   |     | 1   |     |     | 1   |     | 1   |     |     | P    |
| c.506G>A        | p.R169Q        |      |     | 1   |     |     | 1   | 1   |     |     | 1   |     |     |     | 1   | 1   |     | P    |
| c.506G>T        | p.R169L        |      | 1   | 1   |     |     | 1   | 1   |     |     | 1   |     |     |     |     | 1   | 1   | P    |
| c.515G>A        | p.G172E        |      |     | 1   |     |     | 1   | 1   |     |     | 1   |     |     |     | 1   | 1   | 1   | P    |
| c.518A>G        | p.E173G        |      |     | 1   |     |     | 1   | 1   |     |     |     |     |     |     | 1   | 1   |     | P    |
| c.527G>A        | p.R176Q        |      |     |     |     |     | 1   | 1   |     |     | 1   |     |     |     | 1   | 1   | 1   | LP   |
| c.533G>C        | p.G178A        |      |     | 1   |     |     | 1   | 1   |     |     |     |     |     |     | 1   | 1   |     | P    |
| c.535G>A        | p.D179N        |      |     | 1   |     |     | 1   | 1   |     |     | 1   |     |     |     | 1   | 1   |     | P    |
| c.1069G>A       | p.G357S        |      |     |     |     |     | 1   | 1   |     |     |     |     | 1   |     | 1   | 1   | 1   | LP   |
| c.1202A>G       | p.D401G        |      |     |     |     |     | 1   | 1   |     |     |     |     | 1   |     | 1   | 1   |     | LP   |
| c.1244C>G       | p.T415R        |      |     | 1   |     |     | 1   | 1   |     |     | 1   |     |     |     | 1   | 1   |     | P    |
| c.1258C>T       | p.R420W        |      | 1   |     | 1   |     | 1   | 1   |     |     | 1   |     | 1   |     | 1   | 1   | 1   | P    |
| c.1259G>A       | p.R420Q        |      | 1   |     |     |     | 1   | 1   |     |     | 1   |     | 1   |     | 1   | 1   | 1   | P    |
| c.1372G>A       | p.D458N        |      |     |     |     |     | 1   | 1   |     |     |     |     | 1   |     | 1   | 1   |     | LP   |
| c.1375C>G       | p.L459V        |      |     |     |     |     | 1   | 1   |     |     |     |     | 1   |     | 1   | 1   |     | LP   |
| c.5128C>A       | p.H1710N       |      |     |     |     |     | 1   | 1   |     |     |     |     |     |     | 1   | 1   |     | LP   |
| c.5170G>A       | p.E1724K       |      |     |     |     |     | 1   | 1   |     |     |     |     | 1   |     | 1   | 1   | 1   | LP   |
| c.6507G>T       | p.E2169D       |      |     |     |     |     | 1   | 1   |     |     |     |     | 1   |     | 1   | 1   |     | LP   |
| c.6574A>T       | p.M2192L       |      |     |     |     |     | 1   | 1   |     |     |     |     | 1   |     | 1   | 1   |     | LP   |
| c.6645T>G       | p.F2215L       |      |     | 1   |     |     | 1   | 1   |     |     |     |     |     |     | 1   | 1   |     | P    |
| c.6649C>T       | p.H2217Y       |      |     |     |     |     | 1   | 1   |     |     |     |     |     |     | 1   | 1   | 1   | LP   |
| c.6737C>T       | p.S2246L       |      |     | 1   |     |     | 1   | 1   |     |     |     |     |     |     | 1   | 1   | 1   | P    |
| c.6883G>A       | p.G2295R       |      | 1   | 1   |     |     | 1   | 1   |     |     |     |     |     |     | 1   | 1   |     | P    |
| c.6887A>G       | p.E2296G       |      |     | 1   |     |     | 1   | 1   |     |     |     |     |     |     | 1   | 1   |     | P    |

|            |          |  |   |   |  |   |   |  |  |   |   |   |   |   |    |    |
|------------|----------|--|---|---|--|---|---|--|--|---|---|---|---|---|----|----|
| c.6900C>G  | p.D2300E |  |   | 1 |  | 1 | 1 |  |  |   |   | 1 |   |   | LP |    |
| c.6919T>G  | p.F2307V |  | 1 | 1 |  | 1 | 1 |  |  |   |   | 1 | 1 |   | P  |    |
| c.7159G>A  | p.A2387T |  |   | 1 |  | 1 | 1 |  |  | 1 |   |   |   | 1 | P  |    |
| c.7171T>C  | p.F2391L |  |   |   |  | 1 | 1 |  |  |   | 1 |   | 1 | 1 | LP |    |
| c.7199G>T  | p.G2400V |  |   | 1 |  | 1 | 1 |  |  |   |   | 1 | 1 |   | P  |    |
| c.11583G>C | p.Q3861H |  |   | 1 |  | 1 | 1 |  |  |   |   | 1 | 1 |   | P  |    |
| c.11583G>T | p.Q3861H |  |   | 1 |  | 1 | 1 |  |  |   |   | 1 | 1 |   | P  |    |
| c.11590A>G | p.N3864D |  |   | 1 |  | 1 | 1 |  |  |   |   | 1 | 1 |   | P  |    |
| c.11812A>G | p.S3938G |  |   | 1 |  | 1 | 1 |  |  |   |   | 1 | 1 |   | P  |    |
| c.11836G>A | p.G3946S |  |   | 1 |  | 1 | 1 |  |  | 1 |   |   | 1 | 1 | 1  | P  |
| c.11837G>T | p.G3946V |  |   | 1 |  | 1 | 1 |  |  |   |   | 1 | 1 | 1 | P  |    |
| c.11924A>C | p.Q3975P |  |   |   |  | 1 | 1 |  |  |   | 1 |   | 1 | 1 |    | LP |
| c.12006G>T | p.M4002I |  | 1 | 1 |  | 1 | 1 |  |  |   |   | 1 | 1 |   | P  |    |
| c.12059T>C | p.F4020S |  |   | 1 |  | 1 | 1 |  |  |   |   | 1 | 1 |   | P  |    |
| c.12301C>T | p.L4101F |  |   | 1 |  | 1 | 1 |  |  |   |   | 1 | 1 | 1 | P  |    |
| c.12371G>A | p.S4124N |  |   |   |  | 1 | 1 |  |  |   |   | 1 | 1 | 1 | LP |    |
| c.12533A>G | p.N4178S |  |   | 1 |  | 1 | 1 |  |  |   |   | 1 | 1 | 1 | P  |    |
| c.12559G>A | p.E4187K |  |   | 1 |  | 1 | 1 |  |  |   |   | 1 | 1 |   | P  |    |
| c.12579C>G | p.C4193W |  |   | 1 |  | 1 | 1 |  |  |   |   | 1 |   |   | LP |    |
| c.12586A>G | p.T4196A |  |   | 1 |  | 1 | 1 |  |  |   |   | 1 | 1 | 1 | P  |    |
| c.13463A>C | p.Q4488P |  |   | 1 |  |   | 1 |  |  |   |   | 1 |   |   | LP |    |
| c.13489C>T | p.R4497C |  |   | 1 |  | 1 | 1 |  |  |   | 1 |   | 1 | 1 | 1  | P  |
| c.13763T>C | p.I4588T |  |   | 1 |  | 1 | 1 |  |  |   |   | 1 | 1 | 1 | P  |    |
| c.13800T>G | p.F4600L |  |   | 1 |  | 1 | 1 |  |  |   |   | 1 | 1 |   | P  |    |
| c.13997T>A | p.I4666N |  |   | 1 |  | 1 | 1 |  |  |   |   | 1 | 1 |   | P  |    |
| c.14158C>T | p.L4720F |  |   | 1 |  | 1 | 1 |  |  |   |   | 1 | 1 | 1 | P  |    |
| c.14174A>G | p.Y4725C |  |   | 1 |  | 1 | 1 |  |  | 1 |   |   | 1 | 1 | 1  | P  |
| c.14251A>C | p.K4751Q |  |   | 1 |  | 1 | 1 |  |  | 1 |   |   | 1 | 1 | 1  | P  |

|                     |                 |   |  |   |  |  |   |   |  |   |  |  |  |   |   |   |    |
|---------------------|-----------------|---|--|---|--|--|---|---|--|---|--|--|--|---|---|---|----|
| c.14311G>A          | p.V4771I        |   |  | 1 |  |  | 1 | 1 |  |   |  |  |  | 1 | 1 | 1 | P  |
| c.14341T>C          | p.Y4781H        |   |  | 1 |  |  | 1 | 1 |  |   |  |  |  | 1 |   | 1 | P  |
| c.14461G>A          | p.V4821I        |   |  | 1 |  |  | 1 | 1 |  |   |  |  |  | 1 | 1 |   | P  |
| c.14778A>G          | p.I4926M        |   |  | 1 |  |  | 1 | 1 |  |   |  |  |  | 1 | 1 | 1 | P  |
| c.14806C>A          | p.Q4936K        |   |  | 1 |  |  | 1 | 1 |  |   |  |  |  | 1 | 1 |   | P  |
| c.14832_14834dupTCA | p.4944_4945insH |   |  | 1 |  |  | 1 | 1 |  | 1 |  |  |  | 1 |   |   | P  |
| c.14876G>A          | p.R4959Q        |   |  | 1 |  |  | 1 | 1 |  |   |  |  |  | 1 | 1 | 1 | P  |
| c.14878A>C          | p.K4960Q        |   |  | 1 |  |  |   | 1 |  |   |  |  |  | 1 |   |   | LP |
| c.6023 -2 A>G       | Splicing Error  | 1 |  | 1 |  |  |   |   |  |   |  |  |  |   | 1 |   | P  |

Evidence of pathogenicity; Very strong (PVS1), Strong (PS1~4), Moderate (PM1~6) and Supporting (PS1~5) were referred to the Standards and guidelines for the interpretation of sequence variants: a joint consensus recommendation of the American College of Medical Genetics and Genomics and the Association for Molecular Pathology Genetics in medicine<sup>1</sup>.

1: corresponds to the criteria, LP: likely pathogenic, P: pathogenic

**Supplemental Table 2. RYR2 variants and clinical characteristics of the probands.**

| Family lines | Sex | Variants                       | Trio* | Heredity       | Age at the first symptom, year | Age at clinical diagnosis, years | History of Syncope | History of CA | Bidirectional VT | Symptom or arrhythmia of the parents | Reference  |
|--------------|-----|--------------------------------|-------|----------------|--------------------------------|----------------------------------|--------------------|---------------|------------------|--------------------------------------|------------|
| 1            | M   | c.100A>G p.K34E                | (+)   | <i>de novo</i> | 7                              | 9                                | (+)                | (-)           | (+)              | NA                                   |            |
| 2            | F   | exon 3 deletion p.N57_G91del35 | (-)   | maternal       | 1                              | 11                               | (+)                | (-)           | (-)              | Syncope                              | 2          |
| 3            | F   | exon 3 deletion p.N57_G91del35 | (+)   | maternal       | 16                             | 17                               | (+)                | (-)           | (-)              | AF                                   | 2          |
| 4            | M   | exon 3 deletion p.N57_G91del35 | (+)   | paternal       | 17                             | 30                               | (+)                | (+)           | (-)              | Syncope/AF                           | 2          |
| 5            | F   | c.506G>A p.R169Q               | (+)   | <i>de novo</i> | 5                              | 5                                | (+)                | (+)           | (+)              | NA                                   | 2-4        |
| 6            | F   | c.506G>A p.R169Q               | (+)   | <i>de novo</i> | 7                              | 9                                | (+)                | (+)           | (+)              | NA                                   | 2-4        |
| 7            | F   | c.506G>A p.R169Q               | (+)   | <i>de novo</i> | 4                              | 4                                | (-)                | (+)           | (+)              | NA                                   | 2-4        |
| 8            | M   | c.506G>A p.R169Q               | (+)   | <i>de novo</i> | 6                              | 6                                | (-)                | (+)           | (+)              | NA                                   | 2-4        |
| 9            | F   | c.506G>T p.R169L               | (+)   | <i>de novo</i> | 9                              | 9                                | (+)                | (-)           | (+)              | NA                                   | 2          |
| 10           | F   | c.515G>A p.G172E               | (+)   | <i>de novo</i> | 6                              | 8                                | (+)                | (+)           | (+)              | NA                                   | 3          |
| 11           | M   | c.518A>G p.E173G               | (+)   | <i>de novo</i> | 2                              | 4                                | (+)                | (+)           | (-)              | NA                                   |            |
| 12           | M   | c.527G>A p.R176Q               | (-)   | paternal       | 9                              | 9                                | (+)                | (-)           | (-)              | Syncope                              | 5          |
| 13           | F   | c.527G>A p.R176Q               | (-)   | paternal       | 9                              | 22                               | (+)                | (+)           | (-)              | (-)                                  | 5          |
| 14           | M   | c.533G>C p.G178A               | (+)   | <i>de novo</i> | 12                             | 12                               | (-)                | (+)           | (-)              | NA                                   | 2          |
| 15           | M   | c.535G>A p.D179N               | (+)   | <i>de novo</i> | 4                              | 4                                | (+)                | (-)           | (+)              | NA                                   | 6          |
| 16           | M   | c.1069G>A p.G357S              | (+)   | maternal       | 13                             | 13                               | (+)                | (-)           | (+)              | (-)                                  | 3          |
| 17           | F   | c.1202A>G p.D401G              | (+)   | maternal       | 11                             | 11                               | (-)                | (+)           | (-)              | (-)                                  |            |
| 18           | F   | c.1244C>G p.T415R              | (+)   | <i>de novo</i> | 8                              | 42                               | (+)                | (-)           | (-)              | NA                                   | 6          |
| 19           | F   | c.1258C>T p.R420W              | (+)   | maternal       | 12                             | 13                               | (+)                | (+)           | (-)              | (-)                                  | 7          |
| 20           | F   | c.1259G>A p.R420Q              | (-)   | maternal       | 7                              | 12                               | (+)                | (+)           | (-)              | Syncope/VF                           | 2, 6, 8, 9 |
| 21           | M   | c.1259G>A p.R420Q              | (-)   | maternal       | 13                             | 14                               | (+)                | (+)           | (+)              | (-)                                  | 2, 6, 8, 9 |
| 22           | M   | c.1259G>A p.R420Q              | (+)   | maternal       | 10                             | 11                               | (-)                | (+)           | (-)              | Syncope                              | 2, 6, 8, 9 |
| 23           | M   | c.1259G>A p.R420Q              | (+)   | maternal       | NA                             | 14                               | (-)                | (-)           | (-)              | (-)                                  | 2, 6, 8, 9 |

|    |   |            |          |     |                |    |    |     |     |     |             |            |
|----|---|------------|----------|-----|----------------|----|----|-----|-----|-----|-------------|------------|
| 24 | F | c.1372G>A  | p.D458N  | (+) | paternal       | 10 | 11 | (+) | (+) | (-) | (-)         |            |
| 25 | F | c.1375C>G  | p.L459V  | (-) | paternal       | 10 | 37 | (+) | (-) | (+) | PVC         |            |
| 26 | M | c.5128C>A  | p.H1710N | (+) | maternal       | NA | 8  | (-) | (-) | (-) | (-)         |            |
| 27 | M | c.5170G>A  | p.E1724K | (+) | maternal       | 8  | 11 | (+) | (-) | (-) | Syncope     | 2, 6, 7, 9 |
| 28 | F | c.5170G>A  | p.E1724K | (-) | maternal       | 10 | 25 | (+) | (-) | (-) | Syncope/PVC | 2, 6, 7, 9 |
| 29 | F | c.6507G>T  | p.E2169D | (-) | maternal       | 7  | 7  | (+) | (-) | (+) | Syncope     | 2, 6, 7, 9 |
| 30 | M | c.6574A>T  | p.M2192L | (+) | maternal       | 13 | 13 | (+) | (+) | (-) | (-)         | 2, 6       |
| 31 | F | c.6645T>G  | p.F2215L | (+) | <i>de novo</i> | 5  | 7  | (+) | (+) | (-) | NA          |            |
| 32 | F | c.6649C>T  | p.H2217Y | (-) | maternal       | 5  | 7  | (+) | (-) | (-) | Syncope     | 6          |
| 33 | M | c.6737C>T  | p.S2246L | (+) | <i>de novo</i> | 13 | 13 | (-) | (+) | (+) | NA          | 2-4, 6     |
| 34 | F | c.6737C>T  | p.S2246L | (+) | <i>de novo</i> | 3  | 3  | (-) | (+) | (-) | NA          | 2-4, 6     |
| 35 | M | c.6737C>T  | p.S2246L | (+) | <i>de novo</i> | 3  | 3  | (-) | (+) | (-) | NA          | 2-4, 6     |
| 36 | M | c.6737C>T  | p.S2246L | (+) | <i>de novo</i> | 2  | 2  | (-) | (+) | (+) | NA          | 2-4, 6     |
| 37 | F | c.6883G>A  | p.G2295R | (+) | <i>de novo</i> | 8  | 13 | (+) | (+) | (-) | NA          |            |
| 38 | M | c.6887A>G  | p.E2296G | (+) | <i>de novo</i> | 11 | 12 | (+) | (+) | (-) | NA          |            |
| 39 | F | c.6900C>G  | p.D2300E | (+) | <i>de novo</i> | 6  | 6  | (-) | (+) | (-) | NA          |            |
| 40 | F | c.6919T>G  | p.F2307V | (+) | <i>de novo</i> | 7  | 13 | (+) | (+) | (+) | NA          |            |
| 41 | M | c.7159G>A  | p.A2387T | (+) | <i>de novo</i> | 10 | 10 | (-) | (+) | (-) | NA          | 3, 4, 10   |
| 42 | F | c.7171T>C  | p.F2391L | (+) | paternal       | 14 | 14 | (+) | (-) | (-) | (-)         |            |
| 43 | M | c.7199G>T  | p.G2400V | (+) | <i>de novo</i> | 10 | 15 | (+) | (+) | (-) | NA          | 2, 4       |
| 44 | F | c.11583G>C | p.Q3861H | (+) | <i>de novo</i> | 14 | 14 | (-) | (+) | (-) | NA          | 2, 4       |
| 45 | F | c.11583G>T | p.Q3861H | (+) | <i>de novo</i> | 8  | 8  | (+) | (-) | (+) | NA          | 2          |
| 46 | F | c.11590A>G | p.N3864D | (+) | <i>de novo</i> | 11 | 11 | (-) | (+) | (-) | NA          | 2, 6       |
| 47 | M | c.11812A>G | p.S3938G | (+) | <i>de novo</i> | 4  | 5  | (+) | (-) | (+) | NA          | 6          |
| 48 | F | c.11836G>A | p.G3946S | (+) | <i>de novo</i> | 6  | 16 | (+) | (-) | (+) | NA          | 2, 6       |
| 49 | M | c.11836G>A | p.G3946S | (+) | <i>de novo</i> | 6  | 9  | (+) | (+) | (+) | NA          | 2, 6       |
| 50 | M | c.11836G>A | p.G3946S | (+) | <i>de novo</i> | 5  | 7  | (+) | (-) | (+) | NA          | 2, 6       |
| 51 | F | c.11837G>T | p.G3946V | (+) | <i>de novo</i> | 7  | 8  | (+) | (-) | (+) | NA          |            |
| 52 | F | c.11924A>C | p.Q3975P | (+) | paternal       | 12 | 19 | (+) | (-) | (-) | (-)         |            |

|    |   |                     |                 |     |                |    |    |     |     |     |     |             |
|----|---|---------------------|-----------------|-----|----------------|----|----|-----|-----|-----|-----|-------------|
| 53 | M | c.12006G>T          | p.M4002I        | (+) | <i>de novo</i> | 2  | 3  | (+) | (-) | (+) | NA  | 2           |
| 54 | M | c.12059T>C          | p.F4020S        | (+) | <i>de novo</i> | 9  | 13 | (+) | (-) | (+) | NA  |             |
| 55 | F | c.12301C>T          | p.L4101F        | (+) | <i>de novo</i> | 2  | 3  | (+) | (-) | (-) | NA  |             |
| 56 | M | c.12301C>T          | p.L4101F        | (+) | <i>de novo</i> | 5  | 5  | (-) | (+) | (-) | NA  |             |
| 57 | M | c.12371G>A          | p.S4124N        | (-) | maternal       | 9  | 11 | (+) | (-) | (-) | (-) | 2           |
| 58 | M | c.12533A>G          | p.N4178S        | (+) | <i>de novo</i> | 4  | 7  | (+) | (-) | (-) | NA  | 2, 3, 10    |
| 59 | M | c.12559G>A          | p.E4187K        | (+) | <i>de novo</i> | 7  | 7  | (+) | (-) | (-) | NA  | 2, 3, 6, 10 |
| 60 | F | c.12579C>G          | p.C4193W        | (+) | <i>de novo</i> | 6  | 6  | (-) | (+) | (-) | NA  | 2, 6        |
| 61 | M | c.12586A>G          | p.T4196A        | (+) | <i>de novo</i> | 7  | 9  | (+) | (-) | (-) | NA  |             |
| 62 | M | c.13463A>C          | p.Q4488P        | (+) | <i>de novo</i> | 10 | 10 | (+) | (-) | (-) | NA  | 2           |
| 63 | M | c.13489C>T          | p.R4497C        | (+) | maternal       | 8  | 14 | (+) | (+) | (-) | (-) | 2, 5, 6, 11 |
| 64 | M | c.13489C>T          | p.R4497C        | (+) | <i>de novo</i> | 8  | 8  | (-) | (+) | (+) | NA  | 5, 6, 11    |
| 65 | M | c.13763T>C          | p.I4588T        | (+) | <i>de novo</i> | 3  | 3  | (-) | (+) | (+) | NA  |             |
| 66 | F | c.13800T>G          | p.F4600L        | (+) | <i>de novo</i> | 9  | 11 | (+) | (-) | (-) | NA  | 2           |
| 67 | M | c.13997T>A          | p.I4666N        | (+) | <i>de novo</i> | 5  | 6  | (+) | (-) | (-) | NA  |             |
| 68 | M | c.14158C>T          | p.L4720F        | (+) | <i>de novo</i> | 6  | 15 | (+) | (-) | (+) | NA  |             |
| 69 | M | c.14174A>G          | p.Y4725C        | (+) | <i>de novo</i> | 10 | 28 | (+) | (-) | (-) | NA  | 2           |
| 70 | F | c.14251A>C          | p.K4751Q        | (+) | <i>de novo</i> | 6  | 9  | (+) | (-) | (+) | NA  | 2, 4, 9     |
| 71 | M | c.14311G>A          | p.V4771I        | (+) | <i>de novo</i> | 10 | 11 | (+) | (-) | (-) | NA  | 2-5, 9      |
| 72 | M | c.14311G>A          | p.V4771I        | (+) | <i>de novo</i> | 10 | 12 | (+) | (-) | (+) | NA  | 2-5         |
| 73 | F | c.14341T>C          | p.Y4781H        | (+) | <i>de novo</i> | 2  | 2  | (+) | (-) | (-) | NA  |             |
| 74 | F | c.14461G>A          | p.V4821I        | (+) | <i>de novo</i> | 6  | 10 | (+) | (-) | (+) | NA  | 6           |
| 75 | M | c.14461G>A          | p.V4821I        | (+) | <i>de novo</i> | 10 | 14 | (+) | (+) | (-) | NA  | 6           |
| 76 | F | c.14461G>A          | p.V4821I        | (+) | <i>de novo</i> | 8  | 11 | (+) | (-) | (-) | NA  | 6           |
| 78 | M | c.14778A>G          | p.I4926M        | (+) | <i>de novo</i> | 5  | 5  | (-) | (+) | (+) | NA  |             |
| 79 | M | c.14806C>A          | p.Q4936K        | (+) | <i>de novo</i> | 14 | 17 | (+) | (+) | (-) | NA  | 2           |
| 80 | M | c.14832_14834dupTCA | p.4944_4945insH | (+) | <i>de novo</i> | 5  | 5  | (-) | (+) | (-) | NA  | 2           |
| 81 | M | c.14876G>A          | p.R4959Q        | (+) | <i>de novo</i> | 7  | 9  | (+) | (+) | (-) | NA  |             |

|    |   |               |                |     |                |    |    |     |     |     |    |   |
|----|---|---------------|----------------|-----|----------------|----|----|-----|-----|-----|----|---|
| 82 | F | c.14878A>C    | p.K4960Q       | (+) | <i>de novo</i> | 15 | 18 | (+) | (+) | (-) | NA |   |
| 83 | M | c.6023 -2 A>G | Splicing Error | (+) | <i>de novo</i> | 4  | 9  | (+) | (-) | (-) | NA | 6 |

\*Trio (+): Both of the parents underwent genetic testing, (-): One parent has been confirmed to have same variants with probands, proving heritability, but the other has not been tested.

AF: atrial fibrillation, CA: cardiac arrest, PVC: premature ventricular contraction, NA: not applicable, VT: ventricular tachycardia



**Supplemental Table 3. *In silico* prediction of RYR2 variants**

| Variants   | Mutation accessor* | Poly-Phen-2† | CADD Score‡       | ClinVar§ | VarSome |        |
|------------|--------------------|--------------|-------------------|----------|---------|--------|
| c.100A>G   | p.K34E             | Medium       | Possibly damaging | 24.9     | VUS     | VUS/LP |
| c.506G>A   | p.R169Q            | Medium       | Probably damaging | 29.2     | P/LP    | P      |
| c.506G>T   | p.R169L            | Medium       | Probably damaging | 29       | P       | LP     |
| c.515G>A   | p.G172E            | Medium       | Probably damaging | 27.3     | LP      | LP     |
| c.518A>G   | p.E173G            | Medium       | Probably damaging | 28.3     |         | VUS/P  |
| c.527G>A   | p.R176Q            | Medium       | Probably damaging | 26.3     | P       | P      |
| c.533G>C   | p.G178A            | Medium       | Probably damaging | 25.9     |         | VUS/P  |
| c.535G>A   | p.D179N            | Medium       | Probably damaging | 28.9     | VUS     | LP     |
| c.1069G>A  | p.G357S            | Medium       | Probably damaging | 26.6     | P       | LP     |
| c.1202A>G  | p.D401G            | Medium       | Possibly damaging | 23       |         | VUS/P  |
| c.1244C>G  | p.T415R            | Medium       | Probably damaging | 23.6     |         | LP     |
| c.1258C>T  | p.R420W            | Medium       | Probably damaging | 27       | P       | P      |
| c.1259G>A  | p.R420Q            | Medium       | Probably damaging | 25.3     | P       | P      |
| c.1372G>A  | p.D458N            | Medium       | Probably damaging | 25.3     | VUS     | VUS/LP |
| c.1375C>G  | p.L459V            | Medium       | Probably damaging | 21.5     | VUS     | VUS/LP |
| c.5128C>A  | p.H1710N           | Medium       | Probably damaging | 26       |         | VUS/P  |
| c.5170G>A  | p.E1724K           | Medium       | Probably damaging | 29.6     | P/LP    | LP     |
| c.6507G>T  | p.E2169D           | Medium       | Probably damaging | 25       |         | VUS/P  |
| c.6574A>T  | p.M2192L           | Low          | Probably damaging | 24.9     |         | VUS/P  |
| c.6645T>G  | p.F2215L           | Medium       | Probably damaging | 27.7     |         | VUS/P  |
| c.6649C>T  | p.H2217Y           | Medium       | Probably damaging | 29       | LP      | LP     |
| c.6737C>T  | p.S2246L           | Medium       | Probably damaging | 28.9     | P       | P      |
| c.6883G>A  | p.G2295R           | Medium       | Probably damaging | 32       | LP      | LP     |
| c.6887A>G  | p.E2296G           | Medium       | Probably damaging | 30       |         | VUS/P  |
| c.6900C>G  | p.D2300E           | Medium       | Probably damaging | 23.7     |         | VUS/P  |
| c.6919T>G  | p.F2307V           | Medium       | Probably damaging | 28.3     |         | VUS/P  |
| c.7159G>A  | p.A2387T           | Medium       | Probably damaging | 28.2     | P/LP    | P      |
| c.7171T>C  | p.F2391L           | Medium       | Probably damaging | 31       |         | VUS/P  |
| c.7199G>T  | p.G2400V           | Medium       | Probably damaging | 28       |         | VUS/P  |
| c.11583G>C | p.Q3861H           | High         | Probably damaging | 25.4     | LP      | VUS/LP |
| c.11583G>T | p.Q3861H           | High         | Probably damaging | 25.7     | LP      | VUS/LP |
| c.11590A>G | p.N3864D           | Medium       | Probably damaging | 28.5     | VUS     | VUS/LP |
| c.11812A>G | p.S3938G           | Medium       | Probably damaging | 25.7     |         | VUS/LP |
| c.11836G>A | p.G3946S           | Medium       | Probably damaging | 31       | P       | LP     |
| c.11837G>T | p.G3946V           | Medium       | Probably damaging | 28.7     |         | VUS/P  |
| c.11924A>C | p.Q3975P           | Medium       | Probably damaging | 27.6     |         | VUS/LP |
| c.12006G>T | p.M4002I           | Low          | Probably damaging | 25.8     | LP      | LP     |
| c.12059T>C | p.F4020S           | Medium       | Probably damaging | 31       |         | VUS/LP |
| c.12301C>T | p.L4101F           | Medium       | Probably damaging | 24.9     | LP      | LP     |

|            |          |        |                   |      |      |        |
|------------|----------|--------|-------------------|------|------|--------|
| c.12371G>A | p.S4124N | Medium | Probably damaging | 25.5 |      | VUS/LP |
| c.12533A>G | p.N4178S | Low    | Probably damaging | 23.4 | P/LP | LP     |
| c.12559G>A | p.E4187K | Medium | Probably damaging | 28.7 |      | VUS/LP |
| c.12579C>G | p.C4193W | Medium | Probably damaging | 23.8 |      | VUS/P  |
| c.12586A>G | p.T4196A | Low    | Possibly damaging | 22.7 |      | LP     |
| c.13463A>C | p.Q4488P | Medium | Probably damaging | 26.3 |      | VUS/LP |
| c.13489C>T | p.R4497C | Medium | Probably damaging | 32   | P/LP | P      |
| c.13763T>C | p.I4588T | Medium | Possibly damaging | 27.6 | LP   | LP     |
| c.13800T>G | p.F4600L | Medium | Benign            | 23.2 |      | VUS/P  |
| c.13997T>A | p.I4666N | Medium | Probably damaging | 27   |      | VUS/LP |
| c.14158C>T | p.L4720F | Medium | Probably damaging | 28.6 |      | VUS/LP |
| c.14174A>G | p.Y4725C | Medium | Probably damaging | 29.4 | LP   | LP     |
| c.14251A>C | p.K4751Q | Medium | Probably damaging | 29.3 | P/LP | LP     |
| c.14311G>A | p.V4771I | Low    | Probably damaging | 24.9 | P    | P      |
| c.14341T>C | p.Y4781H | Medium | Probably damaging | 26.2 | LP   | LP     |
| c.14461G>A | p.V4821I | Medium | Probably damaging | 24.2 |      | VUS/LP |
| c.14778A>G | p.I4926M | Medium | Probably damaging | 24.5 |      | VUS/LP |
| c.14806C>A | p.Q4936K | Medium | Possibly damaging | 32   |      | LP     |
| c.14876G>A | p.R4959Q | Low    | Probably damaging | 32   | P/LP | P      |
| c.14878A>C | p.K4960Q | Medium | Probably damaging | 27.3 |      | VUS/LP |

\* <http://mutationassessor.org/r3>

† <http://genetics.bwh.harvard.edu/pph2/>

‡ <http://cadd.gs.washington.edu/home>

§ <https://www.ncbi.nlm.nih.gov/clinvar/>

|| <https://varsome.com/>

LP: likely pathogenic, P: pathogenic, VUS: variant of unknown significance.

**Supplemental Table 4. Allele frequency of *RYR2* variants**

| Genomic position in<br>GRCh37* | Variant    |          | Variant ID   | Allele frequency |                    |          |
|--------------------------------|------------|----------|--------------|------------------|--------------------|----------|
|                                |            |          |              | HGVD†            | gnomAD<br>browser‡ | TogoVar§ |
| 1:237433848                    | c.100A>G   | p.K34E   | rs876661385  | ↯                | ↯                  | ↯        |
| 1:237540665                    | c.506G>A   | p.R169Q  | rs397516539  | ↯                | ↯                  | ↯        |
| 1:237540665                    | c.506G>T   | p.R169L  | rs397516539  | ↯                | ↯                  | ↯        |
| 1:237540674                    | c.515G>A   | p.G172E  | rs1553426678 | ↯                | ↯                  | ↯        |
| 1:237540677                    | c.518A>G   | p.E173G  | ↯            | ↯                | ↯                  | ↯        |
| 1:237540686                    | c.527G>A   | p.R176Q  | rs794728708  | ↯                | ↯                  | ↯        |
| 1:237540692                    | c.533G>C   | p.G178A  | ↯            | ↯                | ↯                  | ↯        |
| 1:237540694                    | c.535G>A   | p.D179N  | rs794728709  | ↯                | ↯                  | ↯        |
| 1:237604682                    | c.1069G>A  | p.G357S  | rs1401116572 | ↯                | ↯                  | ↯        |
| 1:237608732                    | c.1202A>G  | p.D401G  | ↯            | ↯                | ↯                  | ↯        |
| 1:237608774                    | c.1244C>G  | p.T415R  | rs1288202574 | ↯                | ↯                  | ↯        |
| 1:237608788                    | c.1258C>T  | p.R420W  | rs190140598  | 2/2418           | 3/249018           | ↯        |
| 1:237608789                    | c.1259G>A  | p.R420Q  | rs794728721  | ↯                | ↯                  | ↯        |
| 1:237617770                    | c.1372G>A  | p.D458N  | rs1553458124 | ↯                | ↯                  | ↯        |
| 1:237617773                    | c.1375C>G  | p.L459V  | ↯            | ↯                | ↯                  | ↯        |
| 1:237777556                    | c.5128C>A  | p.H1710N | ↯            | ↯                | ↯                  | ↯        |
| 1:237777598                    | c.5170G>A  | p.E1724K | rs794728740  | ↯                | ↯                  | ↯        |
| 1:237794793                    | c.6507G>T  | p.E2169D | ↯            | ↯                | ↯                  | ↯        |
| 1:237796896                    | c.6574A>T  | p.M2192L | ↯            | ↯                | ↯                  | ↯        |
| 1:237796965                    | c.6645T>G  | p.F2215L | ↯            | ↯                | ↯                  | ↯        |
| 1:237796971                    | c.6649C>T  | p.H2217Y | rs1372052481 | ↯                | ↯                  | ↯        |
| 1:237798237                    | c.6737C>T  | p.S2246L | rs121918597  | ↯                | ↯                  | ↯        |
| 1:237801747                    | c.6883G>A  | p.G2295R | rs794728745  | ↯                | ↯                  | ↯        |
| 1:237801751                    | c.6887A>G  | p.E2296G | ↯            | ↯                | ↯                  | ↯        |
| 1:237801764                    | c.6900C>G  | p.D2300E | ↯            | ↯                | ↯                  | ↯        |
| 1:237801783                    | c.6919T>G  | p.F2307V | ↯            | ↯                | ↯                  | ↯        |
| 1:237804240                    | c.7159G>A  | p.A2387T | rs794728753  | ↯                | ↯                  | ↯        |
| 1:237804252                    | c.7171T>C  | p.F2391L | ↯            | ↯                | ↯                  | ↯        |
| 1:237804280                    | c.7199G>T  | p.G2400V | ↯            | ↯                | ↯                  | ↯        |
| 1:237935337                    | c.11583G>C | p.Q3861H | ↯            | ↯                | ↯                  | ↯        |
| 1:237935337                    | c.11583G>T | p.Q3861H | ↯            | ↯                | ↯                  | ↯        |
| 1:237935344                    | c.11590A>G | p.N3864D | rs1573887621 | ↯                | ↯                  | ↯        |
| 1:237942002                    | c.11812A>G | p.S3938G | ↯            | ↯                | ↯                  | ↯        |
| 1:237942026                    | c.11836G>A | p.G3946S | rs794728777  | ↯                | ↯                  | ↯        |
| 1:237942027                    | c.11837G>T | p.G3946V | ↯            | ↯                | ↯                  | ↯        |
| 1:237944908                    | c.11924A>C | p.Q3975P | ↯            | ↯                | ↯                  | ↯        |
| 1:237947018                    | c.12006G>T | p.M4002I | ↯            | ↯                | ↯                  | ↯        |

|             |            |          |              |   |          |   |
|-------------|------------|----------|--------------|---|----------|---|
| 1:237947071 | c.12059T>C | p.F4020S | ↔            | ↔ | ↔        | ↔ |
| 1:237947313 | c.12301C>T | p.L4101F | rs794728785  | ↔ | ↔        | ↔ |
| 1:237947383 | c.12371G>A | p.S4124N | ↔            | ↔ | ↔        | ↔ |
| 1:237947545 | c.12533A>G | p.N4178S | rs794728787  | ↔ | ↔        | ↔ |
| 1:237947571 | c.12559G>A | p.E4187K | rs794728790  | ↔ | ↔        | ↔ |
| 1:237947591 | c.12579C>G | p.C4193W | ↔            | ↔ | ↔        | ↔ |
| 1:237947598 | c.12586A>G | p.T4196A | rs1174371313 | ↔ | ↔        | ↔ |
| 1:237951422 | c.13463A>C | p.Q4488P | ↔            | ↔ | ↔        | ↔ |
| 1:237954741 | c.13489C>T | p.R4497C | rs121918600  | ↔ | ↔        | ↔ |
| 1:237955604 | c.13763T>C | p.I4588T | rs876661386  | ↔ | ↔        | ↔ |
| 1:237957184 | c.13800T>G | p.F4600L | ↔            | ↔ | ↔        | ↔ |
| 1:237961377 | c.13997T>A | p.I4666N | ↔            | ↔ | 2/244982 | ↔ |
| 1:237969443 | c.14158C>T | p.L4720F | ↔            | ↔ | ↔        | ↔ |
| 1:237969459 | c.14174A>G | p.Y4725C | ↔            | ↔ | ↔        | ↔ |
| 1:237969536 | c.14251A>C | p.K4751Q | rs794728802  | ↔ | ↔        | ↔ |
| 1:237972213 | c.14311G>A | p.V4771I | rs794728804  | ↔ | ↔        | ↔ |
| 1:237972243 | c.14341T>C | p.Y4781H | rs1553335836 | ↔ | ↔        | ↔ |
| 1:237982363 | c.14461G>A | p.V4821I | rs1432337470 | ↔ | ↔        | ↔ |
| 1:237994835 | c.14778A>G | p.I4926M | ↔            | ↔ | ↔        | ↔ |
| 1:237994863 | c.14806C>A | p.Q4936K | ↔            | ↔ | ↔        | ↔ |
| 1:237995919 | c.14876G>A | p.R4959Q | rs794728811  | ↔ | ↔        | ↔ |
| 1:237995921 | c.14878A>C | p.K4960Q | ↔            | ↔ | ↔        | ↔ |

\* Only the first position is described on deletion or insertions variant that involves several bases.

† <http://www.hgvd.genome.med.kyoto-u.ac.jp/index.html>

‡ <http://gnomad.broadinstitute.org> We described the total allele count of all the ethnic groups in genomAD v2.1.1.

§ <https://togovar.biosciencedbc.jp/> We described summed up numbers of the Japanese datasets (Japanese Genotype-phenotype Archive, Human Genetic Variation Database, and ToMMo 3.5KJPNv2 Allele Frequency Panel) in TogoVar databases.

**Supplemental Table 5. Characteristics of probands with or without Epilepsy or Intellectual disability**

|                                  | <b>Epilepsy* (+)</b><br><b>n = 15</b> | <b>Epilepsy* (-)</b><br><b>n = 67</b> | <b>P-</b><br><b>values</b> | <b>Intellectual</b><br><b>disability (+)</b><br><b>n = 8</b> | <b>Intellectual</b><br><b>disability (-)</b><br><b>n = 74</b> | <b>P-</b><br><b>values</b> |
|----------------------------------|---------------------------------------|---------------------------------------|----------------------------|--------------------------------------------------------------|---------------------------------------------------------------|----------------------------|
| Male sex, n (%)                  | 11 (73.3)                             | 34 (50.7)                             | 0.15                       | 4 (50.0)                                                     | 41 (55.4)                                                     | 1.00                       |
| De novo/Familial cases, n (%)    | 2/13<br>(13.3/86.7)                   | 22/45<br>(32.8/67.2)                  | 0.21                       | 0/8<br>(0/100)                                               | 24/50<br>(32.4/67.6)                                          | 0.10                       |
| Age at first symptom, years      | 7.0 [5.3, 8.8]                        | 8.0 [5.0, 10.0]                       | 0.30                       | 6.5 [4.8, 7.0]                                               | 8.0 [5.0, 10.0]                                               | 0.075                      |
| Age at clinical diagnosis, years | 9.0 [8.5, 13.5]                       | 10.0 [6.5, 13.0]                      | 0.46                       | 8.0 [5.5, 11.5]                                              | 10.5 [7.0, 13.0]                                              | 0.28                       |
| Syncope†, n (%)                  | 12 (80.0)                             | 49 (73.1)                             | 0.75                       | 7 (87.5)                                                     | 54 (73.0)                                                     | 0.67                       |
| Syncope age, years               | 7.0 [5.5, 8.3]                        | 8.0 [6.0, 10.0]                       | 0.21                       | 7.0 [5.5, 7.0]                                               | 8.0 [6.0, 10.0]                                               | 0.082                      |
| CA‡, n (%)                       | 7 (46.7)                              | 34 (50.7)                             |                            | 3 (37.5)                                                     | 38 (51.4)                                                     | 0.71                       |
| CA age, years                    | 9.0 [8.0, 11.0]                       | 10.0 [5.3, 12.0]                      | 0.93                       | 8.0 [6.0, 8.5]                                               | 10.0 [6.0, 12.8]                                              | 0.29                       |
| Bidirectional VT‡, n (%)         | 8 (53.3)                              | 22 (32.8)                             | 0.15                       | 3 (37.5)                                                     | 27 (36.5)                                                     | 1.00                       |
| Variant location §, n (%)        |                                       |                                       |                            |                                                              |                                                               |                            |
| N-terminus domain                | 3 (21.4)                              | 21 (31.3)                             | 0.77                       | 1 (12.5)                                                     | 23 (31.5)                                                     | 0.34                       |
| Central domain                   | 2 (14.3)                              | 9 (13.4)                              |                            | 1 (12.5)                                                     | 10 (13.7)                                                     |                            |
| C-terminus domain                | 8 (57.1)                              | 28 (41.8)                             |                            | 6 (75.0)                                                     | 30 (41.1)                                                     |                            |
| Other area                       | 1 (7.1)                               | 9 (13.4)                              |                            | 0 (0.0)                                                      | 10 (13.7)                                                     |                            |

Data are n (%) and median [interquartile range].

CA: cardiac arrest, VT: ventricular tachycardia.

\* Epilepsy includes epilepsy and epileptic seizure

† All syncope and CA events before clinical diagnosis have counted on the list and some probands have both events.

‡ Documentation on any electrocardiogram recordings

§ Splicing error is not included.

Probands with epilepsy: R169Q, R176Q, T415R, H1710N, S2246L, F2307V, G3946S, M4002I, F4020S, N4178S, T4196A, L4720F, V4821I, I4926M, Splicing Error (c.6023–2 A>G)

Probands with intellectual disability; F2307V, E4187K, I4666N, L4720F, Y4781H, V4821I, R4959Q

Underlined variants: One proband for each variants showed both epilepsy and intellectual disability

**Supplemental Table 6. Clinical characteristics of the parents carrying *RYR2* variants**

|                                         | <b>Total</b> | <b>Father</b> | <b>Mother</b> |
|-----------------------------------------|--------------|---------------|---------------|
| <b>Number of parents, n</b>             | <b>24</b>    | <b>7</b>      | <b>17</b>     |
| Syncope, n (%)                          | 9 (37.5)*    | 1 (14.3)      | 8 (47.0)*     |
| CA, n (%)                               | 1 (4.2)*     | 0 (0)         | 1 (5.9)*      |
| Atrial fibrillation, n (%)              | 2 (8.3)      | 1 (12.5)      | 1 (5.9)       |
| Premature ventricular contractions, (%) | 3 (12.0)     | 1 (12.5)      | 2 (11.8)      |

Data are n (%)

CA: cardiac arrest

\* This person had both syncope and CA event.

**Supplemental Table 7. Association between probands phenotype and parental syncope or aborted cardiac arrest.**

|                                     | Parental history of<br>syncope or CA (+)<br>n = 9 | Parental history of<br>syncope or CA (-)<br>n = 15 | P-values |
|-------------------------------------|---------------------------------------------------|----------------------------------------------------|----------|
| Male sex, n (%)                     | 4 (44.4)                                          | 7 (46.7)                                           | 1.00     |
| Age at first symptom, years         | 8.0 [7.0, 10.0]                                   | 12.0 [10.0, 13.0]                                  | 0.019    |
| Age at clinical diagnosis, years    | 11.0 [9.0, 12.0]                                  | 14.0 [12.0, 15.5]                                  | 0.10     |
| Syncope*, n (%)                     | 8 (88.9)                                          | 12 (80.0)                                          | 1.00     |
| Syncope age, years                  | 7.5 [6.5, 9.3]                                    | 13.0 [10.0, 13.3]                                  | 0.016    |
| CA*, n (%)                          | 3 (33.3)                                          | 7 (46.7)                                           | 0.68     |
| CA age, years                       | 12.0 [11.0, 21.0]                                 | 12.0 [11.0, 13.5]                                  | 0.82     |
| Initial symptom: Syncope/ CA, n (%) | 8/1 (88.9/11.1)                                   | 10/3 (76.9/23.1)                                   | 0.62     |
| Worst symptom: Syncope/ CA, n (%)   | 6/3 (66.7/33.3)                                   | 6/7 (46.2/53.8)                                    | 0.42     |
| ECG parameters                      |                                                   |                                                    |          |
| Heart rate, base per minutes        | 57 [53, 70]                                       | 60 [54, 73]                                        | 0.61     |
| QT, ms                              | 409 [400, 420]                                    | 420 [400, 441]                                     | 0.42     |
| QTc, ms                             | 393 [384, 441]                                    | 424 [401, 447]                                     | 0.16     |
| Bidirectional VT, n (%)             | 1 (11.1)                                          | 3 (20.0)                                           | 1.00     |
| Bradycardia for age, n (%)          | 3 (33.3)                                          | 1 (6.7)                                            | 0.13     |
| Epilepsy, n (%)                     | 0 (0)                                             | 2 (13.3)                                           | 0.51     |

Data are n (%) and median [interquartile range].

CA: cardiac arrest, VT: ventricular tachycardia.

\* All syncope and CA events before clinical diagnosis have counted on the list and some probands have both events.

**Supplemental Table 8.****Logistic regression analyses of *RYR2* variant carrying parent's factors for proband's aborted cardiac arrest.**

| <b>Variables</b>                                  | <b>Univariable</b> | <b>Multivariable*</b>       |
|---------------------------------------------------|--------------------|-----------------------------|
|                                                   | <b>OR (95% CI)</b> | <b>Adjusted OR (95% CI)</b> |
| Maternal-originated inheritance,<br>(vs Paternal) | 0.93 (0.16 – 5.54) | 0.86 (0.14 – 5.41)          |
| Parent's history of syncope or CA                 | 0.57 (0.10 – 3.18) | 0.57 (0.10 – 3.21)          |

\*Multivariate logistic regression analysis was adjusted for proband's sex.

CA: cardiac arrest, CI: confidence interval, OR: odds ratio.



**Supplemental Table 9. Characteristics of the probands by inheritance origin.**

|                                            | <b>Maternal-originated<br/>inheritance<br/>n = 17</b> | <b>Paternal-originated<br/>inheritance<br/>n = 7</b> | <b>P-values</b> |
|--------------------------------------------|-------------------------------------------------------|------------------------------------------------------|-----------------|
| <b>Male sex, n (%)</b>                     | 9 (52.9)                                              | 2 (28.6)                                             | 0.39            |
| <b>Age at first symptom, years</b>         | 10.0 [7.5, 12.5]                                      | 10.0 [9.5, 13.0]                                     | 0.25            |
| <b>Age at clinical diagnosis, years</b>    | 12.0 [11.0, 14.0]                                     | 19.0 [12.5, 26.0]                                    | 0.067           |
| <b>Syncope*, n (%)</b>                     | 13 (76.5)                                             | 7 (100)                                              | 0.28            |
| <b>Syncope age, years</b>                  | 9.0 [7.0, 13.0]                                       | 12.0 [10.0, 15.0]                                    | 0.086           |
| <b>CA*, n (%)</b>                          | 7 (41.2)                                              | 3 (42.9)                                             | 1.00            |
| <b>CA age, years</b>                       | 12.0 [11.5, 13.5]                                     | 11.0 [10.0, 20.5]                                    | 0.65            |
| <b>Initial symptom: Syncope/ CA, n (%)</b> | 12/3 (80.0/20.0)                                      | 6/1 (85.7/14.3)                                      | 1.00            |
| <b>Worst symptom: Syncope/ CA, n (%)</b>   | 8/7 (53.3/46.7)                                       | 4/3 (57.1/42.9)                                      | 1.00            |
| <b>ECG parameters</b>                      |                                                       |                                                      |                 |
| <b>Heart rate, base per minutes</b>        | 59 [56, 72]                                           | 53 [44, 67]                                          | 0.15            |
| <b>QT, ms</b>                              | 412 [392, 428]                                        | 409 [400, 461]                                       | 0.46            |
| <b>QTc, ms</b>                             | 416 [396, 446]                                        | 404 [392, 445]                                       | 0.78            |
| <b>Bidirectional VT, n (%)</b>             | 3 (17.6)                                              | 1 (14.3)                                             | 1.00            |
| <b>Bradycardia for age, n (%)</b>          | 2 (11.8)                                              | 2 (28.6)                                             | 0.55            |
| <b>Epilepsy, n (%)</b>                     | 1 (5.9)                                               | 1 (14.3)                                             | 0.51            |

Data are n (%) and median [interquartile range].

CA: cardiac arrest, VT: ventricular tachycardia.

\* All syncope and CA events before clinical diagnosis have counted on the list and some probands have both events.

**Supplemental Table 10. Characteristics of the probands by variant's domain.**

|                                       | <b>C-terminus domain</b><br><b>n = 36</b> | <b>N-terminus domain</b><br><b>n = 24</b> | <b>P-values</b> |
|---------------------------------------|-------------------------------------------|-------------------------------------------|-----------------|
| <b>De novo/ Familial cases, n (%)</b> | 33/3 (91.7/8.3)                           | 10/14 (41.7/58.3)                         | <0.001          |
| <b>Age at first symptom, years</b>    | 7.0 [5.0, 9.0]                            | 9.0 [6.0, 11.5]                           | 0.11            |
| <b>Syncope*, n (%)</b>                | 28 (77.8)                                 | 18 (75.0)                                 | 1.00            |
| <b>Syncope age, years</b>             | 7.0 [5.8, 9.0]                            | 9.0 [6.3, 13.0]                           | 0.12            |
| <b>CA*, n (%)</b>                     | 13 (36.1)                                 | 15 (62.5)                                 | 0.065           |
| <b>CA age, years</b>                  | 9.0 [5.0, 14.0]                           | 10.0 [7.0, 12.0]                          | 0.82            |

Data are n (%) and median [interquartile range].

CA: cardiac arrest.

\* All syncope and CA events before clinical diagnosis have counted on the list and some probands have both events.

## Supplemental References

1. Richards S, Aziz N, Bale S, Bick D, Das S, Gastier-Foster J, Grody WW, Hegde M, Lyon E, Spector E, Voelkerding K, Rehm HL. Standards and guidelines for the interpretation of sequence variants: a joint consensus recommendation of the American College of Medical Genetics and Genomics and the Association for Molecular Pathology. *Genetics in medicine* May 2015;17:405-424.
2. Ohno S, Hasegawa K, Horie M. Gender Differences in the Inheritance Mode of RYR2 Mutations in Catecholaminergic Polymorphic Ventricular Tachycardia Patients. *PLOS ONE* 2015;10:e0131517.
3. Medeiros-Domingo A, Bhuiyan ZA, Tester DJ, Hofman N, Bikker H, van Tintelen JP, Mannens MM, Wilde AA, Ackerman MJ. The RYR2-encoded ryanodine receptor/calcium release channel in patients diagnosed previously with either catecholaminergic polymorphic ventricular tachycardia or genotype negative, exercise-induced long QT syndrome: a comprehensive open reading frame mutational analysis. *Journal of the American College of Cardiology* Nov 24 2009;54:2065-2074.
4. Kawamura M, Ohno S, Naiki N, et al. Genetic Background of Catecholaminergic Polymorphic Ventricular Tachycardia in Japan. *Circ J* 2013;77:1705-1713.
5. Priori SG, Chen SRW. Inherited Dysfunction of Sarcoplasmic Reticulum Ca<sup>2+</sup> Handling and Arrhythmogenesis. *Circulation Research* 2011;108:871-883.
6. Kawata H, Ohno S, Aiba T, et al. Catecholaminergic Polymorphic Ventricular Tachycardia (CPVT) Associated With Ryanodine Receptor (RyR2) Gene Mutations – Long-Term Prognosis After Initiation of Medical Treatment –. *Circ J* 2016;advpub.
7. van der Werf C, Nederend I, Hofman N, et al. Familial evaluation in catecholaminergic polymorphic ventricular tachycardia: disease penetrance and expression in cardiac ryanodine receptor mutation-carrying relatives. *Circulation Arrhythmia and electrophysiology* Aug 1 2012;5:748-756.
8. Wang YY, Mesirca P, Marqués-Sulé E, Zahradnikova A, Jr., Villejoubert O, D'Ocon P, Ruiz C, Domingo D, Zorio E, Mangoni ME, Benitah JP, Gómez AM. RyR2R420Q catecholaminergic polymorphic ventricular tachycardia mutation induces bradycardia by disturbing the coupled clock pacemaker mechanism. *JCI insight* Apr 20 2017;2.
9. Ozawa J, Ohno S, Fujii Y, Makiyama T, Suzuki H, Saitoh A, Horie M. Differential Diagnosis Between Catecholaminergic Polymorphic Ventricular Tachycardia and Long QT Syndrome Type 1 – Modified Schwartz Score. *Circ J* Aug 24 2018;82:2269-2276.
10. Hayashi M, Denjoy I, Extramiana F, et al. Incidence and Risk Factors of Arrhythmic Events in Catecholaminergic Polymorphic Ventricular Tachycardia. *Circulation* 2009;119:2426-2434.
11. Priori SG, Napolitano C, Memmi M, et al. Clinical and molecular characterization of patients with catecholaminergic polymorphic ventricular tachycardia. *Circulation* Jul 2 2002;106:69-74.
