# Supplementary figures and images for: Impact of cascade screening for catecholaminergic polymorphic ventricular tachycardia type 1
Source: PubMed Central journal article supplement — Heart. 2022 Feb 8;108(11):840–7. doi: 10.1136/heartjnl-2021-320220 (PMC9120385; doi:10.1136/heartjnl-2021-320220), 2022-02-08

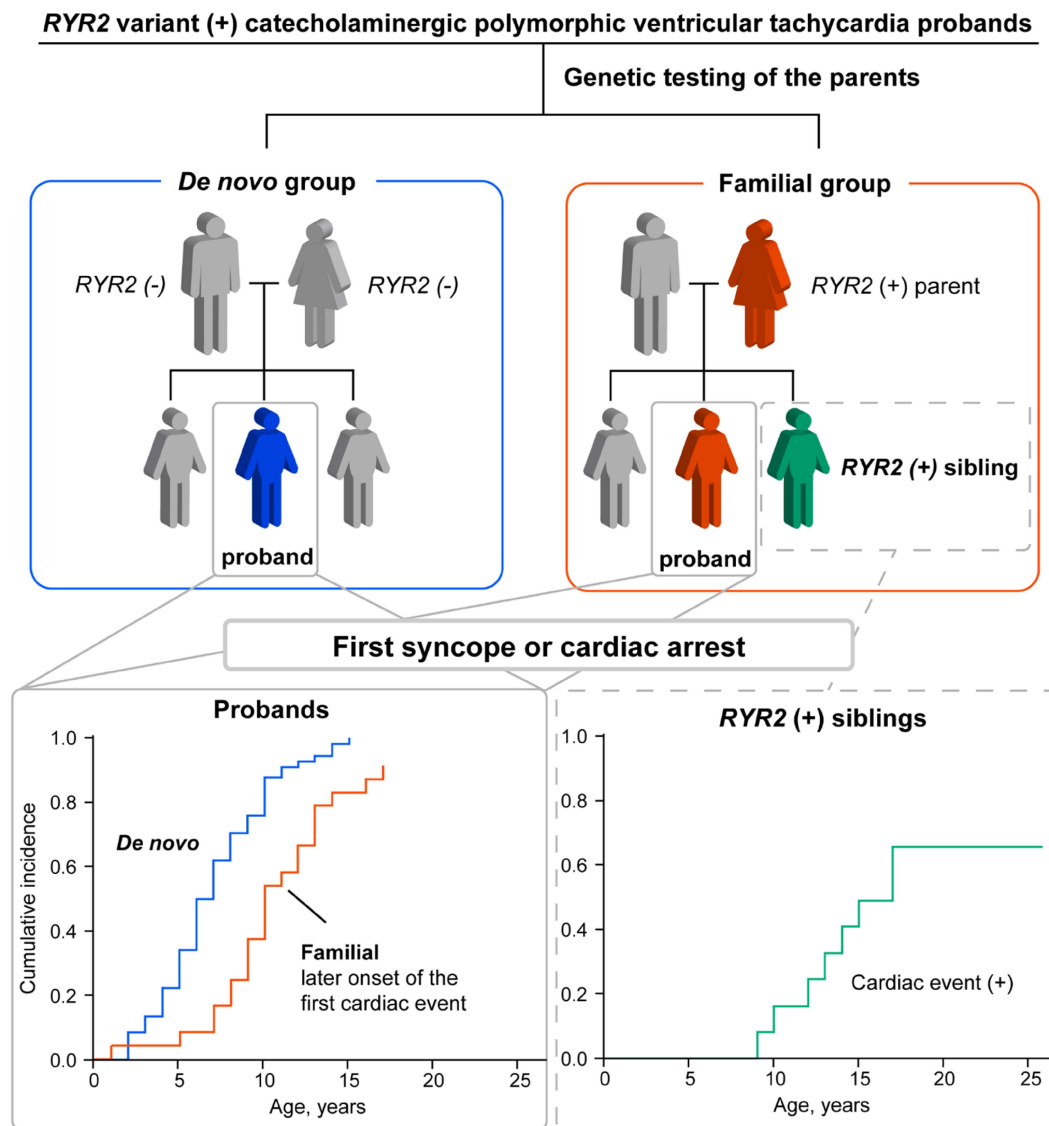

Supplement: heartjnl-2021-320220supp002.pdf [file heartjnl-2021-320220supp002.pdf]
